# Supplementary material for: Erythrocyte Saturated Fatty Acids and Incident Type 2 Diabetes in Chinese Men and Women: A Prospective Cohort Study
Source: PubMed Central journal article supplement (PMC6212875; doi:10.3390/nu10101393), 2018-10-01
Supplement: nutrients-10-01393-s001.pdf [file nutrients-10-01393-s001.pdf]

# Erythrocyte Saturated Fatty Acids and Incident Type 2 Diabetes in Chinese Men and Women: A Prospective Cohort Study

**Table S1.** Review of literature examining association of circulating SFAs with incident type 2 diabetes.

| Author, Year                   | Age range       | N <sup>a</sup> | Years of follow-up | Biological samples | 14:0           | 16:0 | 18:0 | 20:0 | 22:0 | 24:0 | Total SFAs |
|--------------------------------|-----------------|----------------|--------------------|--------------------|----------------|------|------|------|------|------|------------|
| Wang, 2003 <sup>[1]</sup>      | 45–64 y         | 2909 (252)     | 9.0 y              | Plasma PL          | — <sup>b</sup> | ↑    | ↑    | —    | —    | —    | ↑          |
| Hodge, 2007 <sup>[2]</sup>     | 36–72 y         | 346/3391       | 4.0 y              | Plasma PL          | —              | NS   | ↑    | —    | —    | —    | ↑          |
| Krachler, 2008 <sup>[3]</sup>  | 40–60 y         | 159/291        | 5.4 y              | Erythrocyte        | NS             | NS   | NS   | —    | —    | —    | NS         |
| Patel, 2010 <sup>[4]</sup>     | 40–79 y         | 199/184        | 10.0 y             | Erythrocyte        | NS             | ↑    | NS   | —    | —    | —    | NS         |
| Kroger, 2011 <sup>[5]</sup>    | 35–65 y         | 673/2114       | 7.0 y              | Erythrocyte        | NS             | NS   | NS   | ↓    | NS   | ↑    | NS         |
| Alhazmi, 2014 <sup>[6]</sup>   | 55–85 y         | 37/150         | 5.0 y              | Whole blood        | —              | NS   | NS   | —    | —    | ↓    | —          |
| Forouhi, 2014 <sup>[7]</sup>   | 53.7 y          | 12132/15919    | 9.8 y              | Plasma PL          | ↑              | ↑    | ↑    | ↓    | ↓    | ↓    | —          |
| Mahendran, 2014 <sup>[8]</sup> | 45–73 y (men)   | 735 (30)       | 5.0 y              | Erythrocyte        | —              | NS   | NS   | —    | —    | —    | NS         |
| Lankinen, 2015 <sup>[9]</sup>  | 45–68 y (men)   | 1302 (71)      | 5.9 y              | Plasma PL          | NS             | NS   | ↑    | NS   | NS   | NS   | NS         |
| Lemaitre, 2015 <sup>[10]</sup> | ≥65 y           | 3179 (284)     | 10.0 y             | Plasma PL          | —              | —    | —    | ↓    | ↓    | ↓    | —          |
| Ma, 2015 <sup>[11]</sup>       | ≥65 y           | 3004 (297)     | 10.0 y             | Plasma PL          | NS             | ↑    | ↑    | —    | —    | —    | —          |
| Harris, 2016 <sup>[12]</sup>   | 65–80 y (women) | 6379 (703)     | 11.0 y             | Erythrocyte        | ↑              | ↑    | NS   | NS   | NS   | NS   | NS         |
| Takkunen, 2016 <sup>[13]</sup> | 40–65 y         | 383 (155)      | 11.0 y             | Serum              | NS             | NS   | NS   | —    | —    | —    | NS         |
| Yakoob, 2016 <sup>[14]</sup>   | 30–75 y         | 3333 (277)     | 15.2 y             | Plasma PL          | NS             | —    | —    | —    | —    | —    | —          |
| Akter, 2017 <sup>[15]</sup>    | 34–69 y         | 336/678        | 5.0 y              | Serum              | NS             | NS   | NS   | NS   | —    | —    | NS         |

Abbreviations: 14:0, myristic acid; 16:0, palmitic acid; 18:0, stearic acid; 20:0, arachidic acid; 22:0, behenic acid; 24:0, lignoceric acid; SFAs, saturated fatty acids; PL, phospholipids. <sup>a</sup> Cohort sample size (incident cases) or cases/controls. <sup>b</sup> “—”, no data; “↑”, positive association; “↓”, inverse association; “NS”, nonsignificant.

**Table S2.** Spearman's rank correlation of erythrocyte SFAs and dietary intake (N = 2683) <sup>a</sup>.

|                          | 14:0    | 16:0    | 18:0   | 20:0     | 22:0     | 24:0    |
|--------------------------|---------|---------|--------|----------|----------|---------|
| Vegetable                | 0.065** | -0.021  | -0.004 | 0.059**  | 0.062**  | -0.005  |
| Fruit                    | 0.013   | -0.028  | -0.022 | 0.004    | 0.041*   | 0.023   |
| Whole grain              | 0.019   | -0.014  | -0.008 | 0.040*   | 0.030    | 0.024   |
| Nuts and seeds           | -0.037  | -0.010  | -0.034 | 0.032    | 0.060**  | 0.053** |
| Animal and vegetable oil | 0.045*  | -0.030  | -0.006 | 0.042*   | 0.020    | 0.045*  |
| Alcohol                  | -0.045* | -0.004  | -0.032 | -0.061** | -0.053** | -0.017  |
| Dairy products           | 0.066** | -0.014  | -0.001 | 0.048*   | 0.027    | 0.015   |
| Sugar                    | 0.025   | -0.043* | -0.007 | 0.046*   | 0.067**  | 0.033   |
| Red and processed meat   | 0.045*  | -0.025  | 0.019  | 0.007    | 0.036    | 0.003   |
| Fish                     | 0.012   | -0.019  | -0.018 | 0.010    | 0.036    | 0.002   |

Abbreviations: 14:0, myristic acid; 16:0, palmitic acid; 18:0, stearic acid; 20:0, arachidic acid; 22:0, behenic acid; 24:0, lignoceric acid. <sup>a</sup>Spearman's rank correlation coefficients were calculated between erythrocyte saturated fatty acids and dietary intake. \*  $p < 0.05$ , \*\*  $p < 0.01$ , \*\*\*  $p < 0.001$ .

**Table S3.** Association of groupings of erythrocyte SFAs with incident type 2 diabetes <sup>a</sup>.

|                 |                      | Quartiles of erythrocyte SFAs concentrations |                  |                  |                  | p-Value |
|-----------------|----------------------|----------------------------------------------|------------------|------------------|------------------|---------|
|                 |                      | Q1 (n = 670)                                 | Q2 (n = 671)     | Q3 (n = 672)     | Q4 (n = 670)     |         |
| Even-chain SFAs | Median (%)           | 40.2                                         | 43.4             | 45.6             | 50.8             |         |
|                 | Cases/ person years  | 58/ 3557                                     | 51/ 3235         | 46/ 3183         | 61/ 3532         |         |
|                 | Model 1 <sup>b</sup> | 1 (reference)                                | 0.78 (0.53–1.14) | 0.75 (0.51–1.11) | 0.92 (0.64–1.32) | 0.700   |
|                 | Model 2 <sup>c</sup> | 1 (reference)                                | 0.78 (0.53–1.14) | 0.76 (0.51–1.12) | 0.92 (0.64–1.32) | 0.710   |
|                 | Model 3 <sup>d</sup> | 1 (reference)                                | 0.74 (0.50–1.08) | 0.68 (0.46–1.01) | 0.85 (0.59–1.23) | 0.351   |
| VLCSFAs         | Median (%)           | 5.23                                         | 6.29             | 7.21             | 8.71             |         |
|                 | Cases/ person years  | 61/ 3265                                     | 53/ 3330         | 47/ 3383         | 55/ 3530         |         |
|                 | Model 1 <sup>b</sup> | 1 (reference)                                | 0.84 (0.58–1.21) | 0.81 (0.55–1.19) | 0.98 (0.68–1.42) | 0.866   |
|                 | Model 2 <sup>c</sup> | 1 (reference)                                | 0.85 (0.59–1.22) | 0.84 (0.57–1.23) | 1.01 (0.70–1.47) | 0.997   |
|                 | Model 3 <sup>d</sup> | 1 (reference)                                | 1.02 (0.70–1.48) | 0.99 (0.68–1.46) | 1.27 (0.88–1.84) | 0.399   |
| Total SFAs      | Median (%)           | 47.6                                         | 50.1             | 52.1             | 58.3             |         |
|                 | Cases/ person years  | 54/ 3533                                     | 58/ 3212         | 47/ 3181         | 57/ 3583         |         |
|                 | Model 1 <sup>b</sup> | 1 (reference)                                | 1.00 (0.69–1.46) | 0.81 (0.55–1.20) | 0.96 (0.66–1.40) | 0.609   |
|                 | Model 2 <sup>c</sup> | 1 (reference)                                | 0.99 (0.68–1.44) | 0.82 (0.55–1.21) | 0.96 (0.66–1.39) | 0.619   |
|                 | Model 3 <sup>d</sup> | 1 (reference)                                | 1.00 (0.68–1.45) | 0.76 (0.51–1.13) | 0.94 (0.64–1.36) | 0.395   |

Abbreviations: 14:0, myristic acid; 16:0, palmitic acid; 18:0, stearic acid; 20:0, arachidic acid; 22:0, behenic acid; 24:0, lignoceric acid; BMI, body mass index; CI, confidence interval; even-chain SFAs, sum of 14:0, 16:0, and 18:0; HDL-C, high-density lipoprotein cholesterol; HR, hazard ratio; LDL-C, low-density lipoprotein cholesterol; SFAs, saturated fatty acids; TG, triglycerides; VLCSFAs, very-long-chain SFAs, sum of 20:0, 22:0, and 24:0 SFAs. <sup>a</sup>Multivariable-adjusted hazard ratios (95% CIs) were calculated for second to fourth quartiles (Q2 to Q4) of the erythrocyte SFAs, compared with the first quartile (Q1). <sup>b</sup>Model 1: adjusted for age, sex, BMI, and ratio of waist to hip circumference; <sup>c</sup>Model 2: included covariates in model 1 plus smoking status, alcohol drinking, tea drinking, education level, household income, physical activity, family history of diabetes, and total energy intake; <sup>d</sup>Model 3: included covariates in model 2 plus LDL-C, HDL-C, TG, and fasting glucose levels.

**Table S4.** Sensitivity analyses for association of erythrocyte SFAs with incident type 2 diabetes <sup>a</sup>.

|                 |                       | Quartiles of erythrocyte SFAs concentrations |                  |                  |                  | <i>p</i> -Value |
|-----------------|-----------------------|----------------------------------------------|------------------|------------------|------------------|-----------------|
|                 |                       | Q1                                           | Q2               | Q3               | Q4               |                 |
| 14:0            | Model 3 <sup>b</sup>  | 1 (reference)                                | 0.90 (0.59–1.35) | 0.89 (0.59–1.33) | 1.20 (0.82–1.76) | 0.242           |
|                 | Model 3a <sup>c</sup> | 1 (reference)                                | 0.89 (0.59–1.35) | 0.89 (0.59–1.33) | 1.20 (0.82–1.76) | 0.282           |
|                 | Model 3b <sup>d</sup> | 1 (reference)                                | 0.90 (0.60–1.36) | 0.89 (0.59–1.33) | 1.22 (0.84–1.79) | 0.214           |
|                 | Model 3c <sup>e</sup> | 1 (reference)                                | 0.90 (0.59–1.36) | 1.00 (0.66–1.52) | 1.29 (0.56–2.80) | 0.197           |
|                 | Model 3d <sup>f</sup> | 1 (reference)                                | 0.88 (0.58–1.34) | 0.91 (0.60–1.37) | 1.17 (0.79–1.73) | 0.344           |
| 16:0            | Model 3 <sup>b</sup>  | 1 (reference)                                | 0.55 (0.37–0.81) | 0.53 (0.35–0.78) | 0.69 (0.48–0.99) | 0.080           |
|                 | Model 3a <sup>c</sup> | 1 (reference)                                | 0.55 (0.37–0.81) | 0.53 (0.35–0.78) | 0.69 (0.48–0.99) | 0.114           |
|                 | Model 3b <sup>d</sup> | 1 (reference)                                | 0.54 (0.37–0.80) | 0.52 (0.35–0.77) | 0.69 (0.48–0.99) | 0.074           |
|                 | Model 3c <sup>e</sup> | 1 (reference)                                | 0.60 (0.39–0.91) | 0.60 (0.37–0.94) | 0.84 (0.46–1.55) | 0.289           |
|                 | Model 3d <sup>f</sup> | 1 (reference)                                | 0.55 (0.36–0.82) | 0.51 (0.34–0.77) | 0.69 (0.47–0.99) | 0.081           |
| 18:0            | Model 3 <sup>b</sup>  | 1 (reference)                                | 1.19 (0.80–1.79) | 1.35 (0.91–2.02) | 1.49 (1.02–2.19) | 0.047           |
|                 | Model 3a <sup>c</sup> | 1 (reference)                                | 1.20 (0.80–1.79) | 1.35 (0.91–2.02) | 1.49 (1.02–2.19) | 0.041           |
|                 | Model 3b <sup>d</sup> | 1 (reference)                                | 1.19 (0.79–1.77) | 1.34 (0.90–2.00) | 1.50 (1.02–2.20) | 0.046           |
|                 | Model 3c <sup>e</sup> | 1 (reference)                                | 1.25 (0.83–1.89) | 1.47 (0.96–2.24) | 1.71 (1.02–2.86) | 0.031           |
|                 | Model 3d <sup>f</sup> | 1 (reference)                                | 1.22 (0.81–1.85) | 1.33 (0.88–2.01) | 1.55 (1.05–2.29) | 0.040           |
| 20:0            | Model 3 <sup>b</sup>  | 1 (reference)                                | 1.04 (0.70–1.54) | 1.39 (0.96–2.02) | 1.46 (1.00–2.12) | 0.035           |
|                 | Model 3a <sup>c</sup> | 1 (reference)                                | 1.04 (0.70–1.54) | 1.39 (0.96–2.02) | 1.46 (1.00–2.12) | 0.028           |
|                 | Model 3b <sup>d</sup> | 1 (reference)                                | 1.06 (0.71–1.57) | 1.43 (0.99–2.09) | 1.47 (1.01–2.14) | 0.038           |
|                 | Model 3c <sup>e</sup> | 1 (reference)                                | 1.04 (0.69–1.55) | 1.39 (0.94–2.05) | 1.60 (1.04–2.46) | 0.018           |
|                 | Model 3d <sup>f</sup> | 1 (reference)                                | 1.04 (0.69–1.56) | 1.45 (0.99–2.12) | 1.43 (0.97–2.11) | 0.046           |
| 22:0            | Model 3 <sup>b</sup>  | 1 (reference)                                | 1.53 (1.05–2.22) | 1.61 (1.10–2.36) | 1.48 (0.99–2.22) | 0.061           |
|                 | Model 3a <sup>c</sup> | 1 (reference)                                | 1.53 (1.05–2.22) | 1.61 (1.10–2.36) | 1.48 (0.99–2.22) | 0.060           |
|                 | Model 3b <sup>d</sup> | 1 (reference)                                | 1.52 (1.05–2.21) | 1.61 (1.10–2.36) | 1.50 (1.00–2.26) | 0.055           |
|                 | Model 3c <sup>e</sup> | 1 (reference)                                | 1.16 (0.68–1.99) | 1.22 (0.69–2.15) | 1.30 (0.71–2.38) | 0.375           |
|                 | Model 3d <sup>f</sup> | 1 (reference)                                | 1.54 (1.05–2.27) | 1.67 (1.13–2.48) | 1.45 (0.95–2.20) | 0.095           |
| 24:0            | Model 3 <sup>b</sup>  | 1 (reference)                                | 0.99 (0.68–1.44) | 0.99 (0.68–1.44) | 1.08 (0.74–1.56) | 0.913           |
|                 | Model 3a <sup>c</sup> | 1 (reference)                                | 0.99 (0.68–1.44) | 0.99 (0.68–1.44) | 1.08 (0.74–1.56) | 0.942           |
|                 | Model 3b <sup>d</sup> | 1 (reference)                                | 0.97 (0.67–1.42) | 0.99 (0.68–1.44) | 1.08 (0.74–1.57) | 0.825           |
|                 | Model 3c <sup>e</sup> | 1 (reference)                                | 1.05 (0.70–1.57) | 1.04 (0.68–1.35) | 1.22 (0.78–1.89) | 0.397           |
|                 | Model 3d <sup>f</sup> | 1 (reference)                                | 1.11 (0.75–1.63) | 1.04 (0.70–1.54) | 1.11 (0.75–1.65) | 0.852           |
| Even-chain SFAs | Model 3 <sup>b</sup>  | 1 (reference)                                | 0.72 (0.49–1.06) | 0.68 (0.46–1.01) | 0.85 (0.59–1.23) | 0.351           |
|                 | Model 3b <sup>d</sup> | 1 (reference)                                | 0.74 (0.50–1.08) | 0.66 (0.45–0.98) | 0.85 (0.59–1.22) | 0.346           |
|                 | Model 3c <sup>e</sup> | 1 (reference)                                | 0.80 (0.53–1.22) | 0.79 (0.50–1.26) | 0.98 (0.52–1.86) | 0.720           |
|                 | Model 3d <sup>f</sup> | 1 (reference)                                | 0.73 (0.50–1.09) | 0.64 (0.42–0.97) | 0.87 (0.60–1.26) | 0.386           |
| VLCSFAs         | Model 3 <sup>b</sup>  | 1 (reference)                                | 1.02 (0.70–1.48) | 0.99 (0.68–1.46) | 1.27 (0.88–1.84) | 0.399           |
|                 | Model 3b <sup>d</sup> | 1 (reference)                                | 1.01 (0.70–1.47) | 1.00 (0.68–1.46) | 1.29 (0.89–1.86) | 0.343           |
|                 | Model 3c <sup>e</sup> | 1 (reference)                                | 0.88 (0.58–1.33) | 0.73 (0.46–1.16) | 1.08 (0.68–1.72) | 0.773           |
|                 | Model 3d <sup>f</sup> | 1 (reference)                                | 1.05 (0.72–1.55) | 1.03 (0.69–1.53) | 1.27 (0.87–1.87) | 0.417           |
| Total SFAs      | Model 3 <sup>b</sup>  | 1 (reference)                                | 1.00 (0.68–1.45) | 0.76 (0.51–1.13) | 0.94 (0.64–1.36) | 0.395           |
|                 | Model 3b <sup>d</sup> | 1 (reference)                                | 0.98 (0.67–1.43) | 0.76 (0.51–1.13) | 0.85 (0.70–1.03) | 0.397           |
|                 | Model 3c <sup>e</sup> | 1 (reference)                                | 1.07 (0.71–1.60) | 0.80 (0.50–1.27) | 0.95 (0.48–1.87) | 0.927           |
|                 | Model 3d <sup>f</sup> | 1 (reference)                                | 0.97 (0.66–1.43) | 0.78 (0.52–1.17) | 0.94 (0.64–1.38) | 0.459           |

Abbreviations: 14:0, myristic acid; 16:0, palmitic acid; 18:0, stearic acid; 20:0, arachidic acid; 22:0, behenic acid; 24:0, lignoceric acid; BMI, body mass index; CI, confidence interval; even-chain SFAs, sum of 14:0, 16:0, and 18:0; HDL-C, high-density lipoprotein cholesterol; HR, hazard ratio; LDL-C, low-density lipoprotein cholesterol; SFAs, saturated fatty acids; TG, triglycerides; VLCSFAs, very-long-chain SFAs, sum of 20:0, 22:0, and 24:0 SFAs. <sup>a</sup> Multivariable-adjusted hazard ratios (95% CIs) were calculated for Q2 to Q4 of the erythrocyte SFAs, compared with Q1. <sup>b</sup> Model 3: adjusted for age, sex, BMI, ratio of waist to hip circumference, smoking status, alcohol drinking, tea drinking, education level, household income, physical activity, family history of diabetes, total energy intake, LDL-C, HDL-C, TG, and fasting glucose levels; <sup>c</sup> Model 3a: for 14:0, 16:0, and 18:0 SFAs, adjusted for model 3 + VLCSFAs; for 20:0, 22:0 and 24:0 SFAs, adjusted for model 3 + even-chain SFAs; <sup>d</sup> Model 3b: adjusted for model 3 + fruits and vegetables, sugar, dairy products, and red and processed meat; <sup>e</sup> Model 3c: adjusted for model 3 + erythrocyte monounsaturated fatty acids (16:1 n-7, 18:1 n-9, 20:1 n-9, 22:1 n-9, 24:1 n-9), erythrocyte polyunsaturated fatty acids (n-3 FA: 18:3, 20:3, 20:5, 22:5, 22:6; n-6 FA: 18:2, 18:3, 20:4); <sup>f</sup> Model 3d: repeated analyses of model 3 after excluding type 2 diabetes cases (n = 13) occurring within one year after baseline.

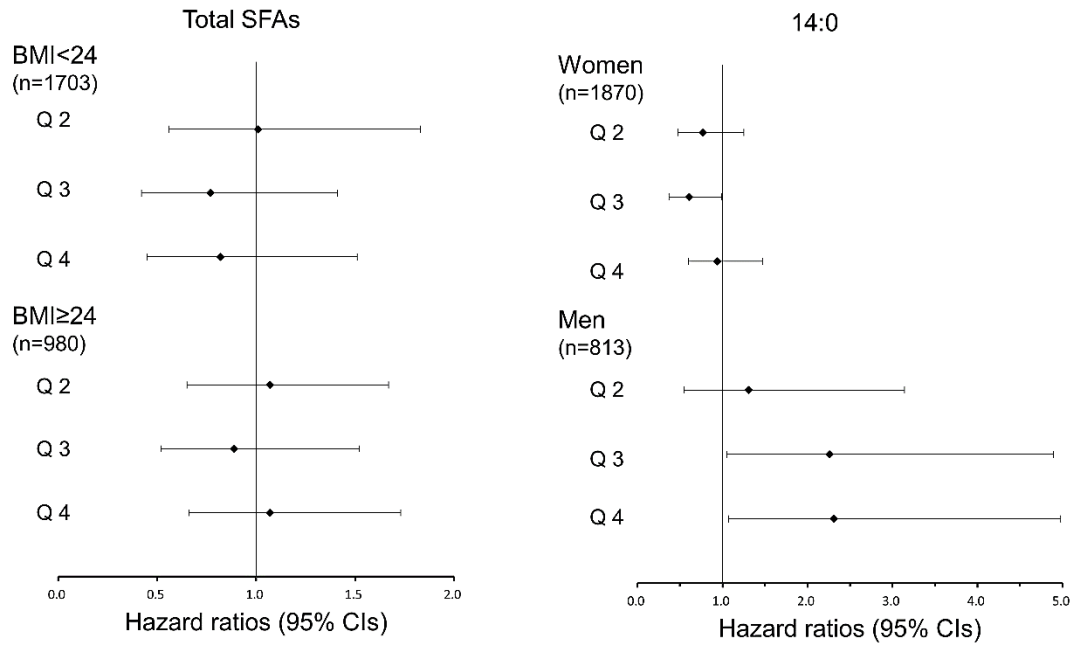

**Figure S1.** Associations of erythrocyte SFAs with incident type 2 diabetes, stratified by categories of body mass index (BMI) and sex. The Cox proportional hazards model was used to estimate the hazard ratios and 95% confidence intervals (CIs) across the second to fourth quartiles (compared with the first quartile) after being adjusted for age, sex, BMI, ratio of waist to hip circumference, smoking status, alcohol drinking, tea drinking, education level, household income, physical activity, family history of diabetes, and total energy intake, as well as low-density lipoprotein cholesterol, high-density lipoprotein cholesterol, triglyceride, and fasting glucose levels. We found interactions of total SFA levels with BMI ( $p = 0.025$ ), and 14:0 SFAs with sex ( $p = 0.037$ ).
